# Supplementary material for: Participating in core outcome set development via Delphi surveys: qualitative interviews provide pointers to inform guidance
Source: PubMed Central journal article supplement (PMC6887093; doi:10.1136/bmjopen-2019-032338), 2019-11-14
Supplement: bmjopen-2019-032338supp001.pdf [file bmjopen-2019-032338supp001.pdf]

## Supplementary File 1. Recruitment Advert

## HAVE YOUR VOICE HEARD BY THE EPITOME STUDY



**WHAT IS  
EPITOME?**

EPITOME stands for “**Exploring Participant Input** in **Core Outcome Set Develop**ME**nt**”.

At the University of Liverpool, the COMET Initiative are keen to learn about people’s experience to help us develop the best methods for future COS studies.



**WHY IS  
EPITOME  
IMPORTANT?**

Stakeholder input into core outcome set (COS) projects has been increasing. But the perspectives of people who have taken part in such studies haven’t yet been explored.

**CALLING ALL PATIENTS, MEMBER OF THE PUBLIC AND HEALTH PROFESSIONALS, WHO HAVE TAKEN PART IN A STUDY TO DEVELOP A CORE OUTCOME SET (COS)\*:  
WE NEED YOU!**

\*COS: an agreed minimum set of outcome measures that should be measured and reported in all trials in a specific area. Outcomes are things like pain, fatigue, quality of life etc.

**CAN I HELP?**

**YES!** Your insights are very valuable to us!  
We are inviting you to take part in a telephone interview about your experiences of taking part in a study to develop a COS. The interview will be at a time that’s convenient for you and last about 45 minutes.  
*We have already spoken to the developers of your COS and they are happy to facilitate our research*

**WHO IS WORKING ON  
EPITOME?**

The lead researcher is Alice Biggane. Alice is a Research Fellow at the University of Liverpool and will be doing the interviews. She’d love to hear from anyone who’s interested in being interviewed for EPITOME. She’s also happy to answer any questions that you may have.  
Email: [abiggane@liverpool.ac.uk](mailto:abiggane@liverpool.ac.uk)  
Tel: +44 (0)151 794 9744






This project has received funding from the European Union’s Horizon 2020 research and innovation programme under the Marie Skłodowska-Curie grant agreement No 676207.
